# Supplementary material for: A localized PCR inhibitor in a porcelain crab suggests a protective role
Source: PeerJ journal article supplement (doi:10.7717/peerj.689), 2014-12-04

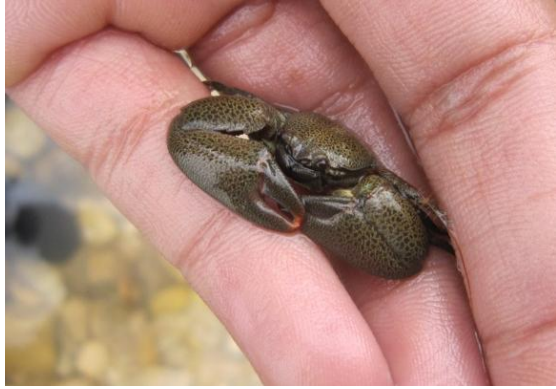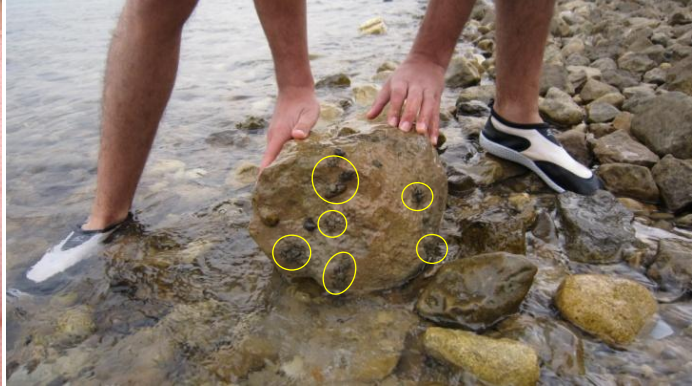

Supplement: Supplementary_Figure_1_plain.pdf [file Supplementary_Figure_1_plain.pdf]
